# Supplementary material
Source: Springer Nature journal article supplement (https://www.springerprofessional.de/resource/supplementary/13638_2011_394_MOESM5_ESM.pdf/11897482)

RF front-end

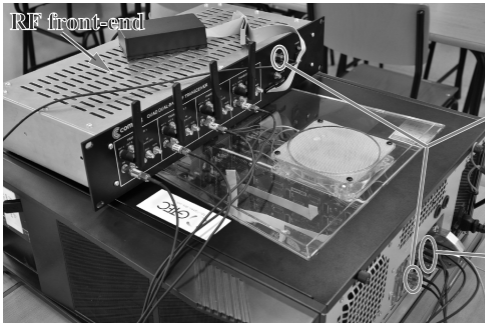

testbed

transmitter

40MHz reference  
oscillator input

4 x DAC output

Supplement: MOESM5 [file 11897482]
